# Supplementary material for: Theranostic Applications of an Ultra-Sensitive T1 and T2 Magnetic Resonance Contrast Agent Based on Cobalt Ferrite Spinel Nanoparticles
Source: MDPI journal article supplement (doi:10.3390/cancers14164026), 2022-08-20
Supplement: s1 [file s1]

SUPPLEMENTARY INFORMATION

**THERANOSTIC APPLICATIONS OF AN ULTRA-SENSITIVE  $T_1$  AND  $T_2$  MAGNETIC RESONANCE  
CONTRAST AGENT BASED ON COBALT FERRITE SPINEL NANOPARTICLES**

Georgy Mikhaylov<sup>1</sup>, Urska Mikac<sup>2</sup>, Miha Butinar<sup>1</sup>, Vito Turk<sup>1</sup>, Boris Turk<sup>1</sup>, Sergey Psakhie<sup>3, ‡</sup>,  
Olga Vasiljeva<sup>1, §, \*</sup>

<sup>1</sup>Department of Biochemistry and Molecular and Structural Biology, Jozef Stefan Institute, Ljubljana, SI-1000, Slovenia

<sup>2</sup>Department of Condensed Matter Physics, Jozef Stefan Institute, Ljubljana, SI-1000, Slovenia

<sup>3</sup>Institute of Strength Physics and Materials Science, Tomsk 634021, Russia,

<sup>‡</sup>Deceased

<sup>§</sup>Present address: OV: CytomX Therapeutics, Inc., South San Francisco, CA 94080, USA

<sup>\*</sup>E-mail: olga.vasiljeva@ijs.si

## SI Materials and Methods

### *Effectiveness of liposome pegylation for masking them from the macrophages uptake.*

THP-1 cells were grown at 37 °C in a humidified air atmosphere with 5% CO<sub>2</sub>. The cells were cultured in the RPMI 1640 medium, supplemented with 10% fetal calf serum, 2 mM L-glutamine, 100 U/ml penicillin, 100 µg/ml streptomycin, and 10 mM HEPES buffer. For differentiation of THP-1 cells to macrophages-like phenotype 30 µl of 10 µM, phorbol 12-myristate 13-acetate (PMA, Invitrogene, Waltham, Massachusetts, USA) was added. 24 hours after cells were incubated with 100 µl of Alexa Fluor 546<sup>TM</sup> functionalized pegylated and non-pegylated liposomes in Dulbecco's Modified Eagle Medium (DMEM, Waltham, Massachusetts, USA) on 96-well optical bottom plate (Nunc, Roskilde, Denmark). After 15 minutes of incubation, cells were washed 3 times by phosphate buffer pH 7.4 and examined by 96-well TECAN plate reader at 561 nm excitation and 572 nm emission (Tecan, Männedorf, canton of Zürich, Switzerland).

### *Cell culture and toxicity ex vivo.*

Primary MMTV-PyMT cells were isolated and cultured as described[1]. The cells were maintained in DMEM supplemented with 10% fetal bovine serum (Sigma), 2 mM L-glutamine (Invitrogene, Waltham, Massachusetts, USA), 100 units of penicillin, and 100 µg/ml streptomycin (Invitrogen) at 37°C in a humidified 5% CO<sub>2</sub> atmosphere. Cells were incubated for 24 hours with 0.15 mM MCFS-Lip solution and with PBS buffer for negative control. As a positive control, 1 µM of staurosporine (STS) was added. Phosphatidylserine exposure and the loss of membrane integrity were measured by labeling cells with Annexin V-PE in the presence of propidium iodide according to the manufacturer's instructions. Cells were then

subjected to FACS analysis using FACScalibur flow cytometer (Becton Dickinson, Franklin Lakes, NJ, USA) and CellQuest software.

## References

1. Vasiljeva, O.; Papazoglou, A.; Krüger, A.; Brodoefel, H.; Korovin, M.; Deussing, J.; Augustin, N.; Nielsen, B.S.; Almholt, K.; Bogyo, M. Tumor cell-derived and macrophage-derived cathepsin B promotes progression and lung metastasis of mammary cancer. *Cancer research* **2006**, *66*, 5242-5250.

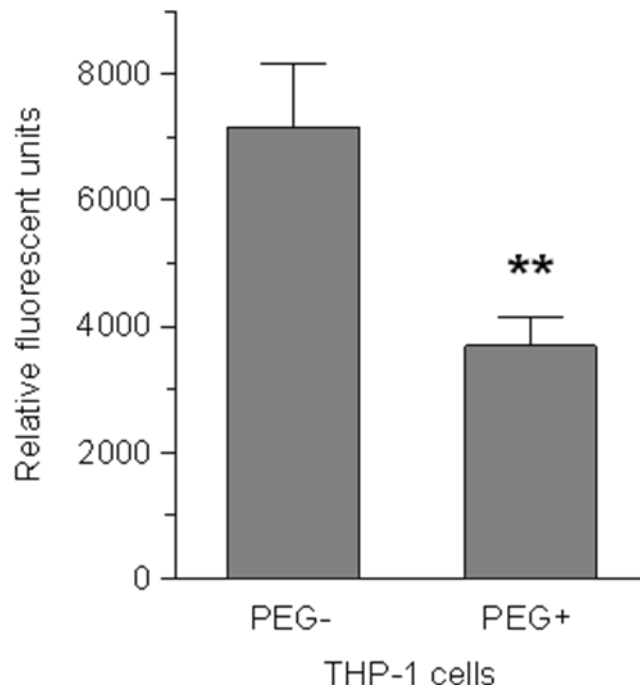

**Figure S1.**

Effectiveness of liposome pegylation for masking them from the macrophages uptake. Fluorescence intensity from the THP-1 cells differentiated to the macrophages-like phenotype and incubated with pegylated and non-pegylated liposomes loaded by Alexa Fluor 565™ (\*\*  $p < 0.01$ ).

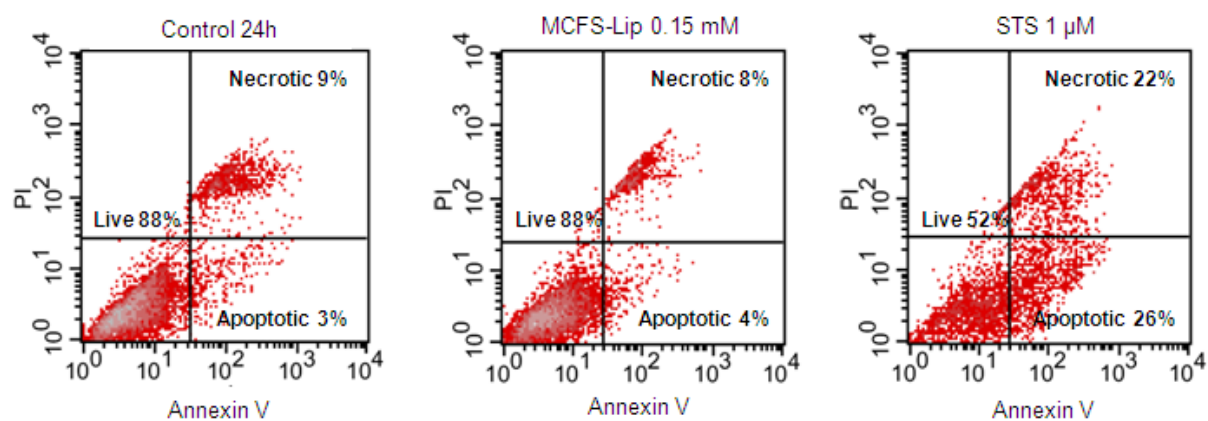

**Figure S2.** Assessment of MCFS-Lip toxicity on cells.

PyMT mouse breast cancer cells labeled by Annexin V-PE in presence of 5  $\mu$ g/ml of propidium iodide. Cells were untreated (negative control), treated with 0.15 mM of MCFS-Lip, and treated 1  $\mu$ M of STS (positive control). The intensity of fluorescence was measured by flow cytometry and data analyzed by Cell Quest software.
